1 **Sustained correction of hippocampal neurogenic**  
2 **and cognitive deficits after a brief treatment by**  
3 **Nutlin-3 in a mouse model of Fragile X Syndrome**  
4

5 Sahar Javadi<sup>1,2</sup>, Yue Li<sup>1,#</sup>, Jie Sheng<sup>1</sup>, Lucy Zhao<sup>1</sup>, Yao Fu<sup>1</sup>,  
6 Daifeng Wang<sup>1,3</sup>, and Xinyu Zhao<sup>1,4,\*</sup>

7  
8 <sup>1</sup>Waisman Center, University of Wisconsin-Madison, Madison, WI 53705, USA.

9 <sup>2</sup>Department of Animal Science, College of Agriculture and Life Science, University of  
10 Wisconsin-Madison, Madison, WI 53705, USA.

11 <sup>3</sup>Department of Biostatistics and Medical Informatics, School of Medicine and Public  
12 Health, University of Wisconsin-Madison, Madison, WI 53705, USA.

13 <sup>4</sup>Department of Neuroscience, School of Medicine and Public Health, University of  
14 Wisconsin-Madison, Madison, WI 53705, USA.

15  
16 \*Correspondence: Xinyu Zhao, Phone: (608) 263-9906; E-mail: [Xinyu.zhao@wisc.edu](mailto:Xinyu.zhao@wisc.edu)

17 # Current address: Institute of Traditional Chinese Medicine, Tianjin University of  
18 Traditional Chinese Medicine, Tianjin 301617, China.

19

20

21

22

## 23 **Abstract**

24 **Background:** Fragile X syndrome (FXS), the most prevalent inherited intellectual  
25 disability and one of the most common monogenic form of autism, is caused by a loss of  
26 FMRP translational regulator 1 (FMR1). We have previously shown that FMR1 represses  
27 the levels and activities of ubiquitin ligase MDM2 in young adult FMR1-deficient mice and  
28 treatment by a MDM2 inhibitor Nutlin-3 rescues both hippocampal neurogenic and  
29 cognitive deficits in FMR1-deficient mice when analyzed shortly after the administration.  
30 However, it is unknown whether Nutlin-3 treatment can have long-lasting therapeutic  
31 effects.

32 **Methods:** We treated 2-month-old young adult FMR1-deficient mice with Nutlin-3 for 10  
33 days and then assessed the persistent effect of Nutlin-3 on both cognitive functions and  
34 adult neurogenesis when mice were 6-month-old mature adults. To investigate the  
35 mechanisms underlying persistent effects of Nutlin-3, we analyzed proliferation and  
36 differentiation of neural stem cells isolated from these mice and assessed the  
37 transcriptome of the hippocampal tissues of treated mice.

38 **Results:** We found that transient treatment with Nutlin-3 of 2-month-old young adult  
39 FMR1-deficient mice prevents the emergence of neurogenic and cognitive deficits in  
40 mature adult FXS mice at 6-month of age. We further found that the long-lasting  
41 restoration of neurogenesis and cognitive function might not be mediated by changing  
42 intrinsic properties of adult neural stem cells. Transcriptomic analysis of the hippocampal  
43 tissue demonstrated that transient Nutlin-3 treatment leads to significant expression  
44 changes in genes related to extracellular matrix, secreted factors, and cell membrane  
45 proteins in FMR1-deficient hippocampus.

46 **Conclusions:** Our data indicates that transient Nutlin-3 treatment in young adults leads  
47 to long-lasting neurogenic and behavioral changes through modulating adult neurogenic  
48 niche rather than intrinsic properties of adult neural stem cells. Our results demonstrate  
49 that cognitive impairments in FXS may be prevented by an early intervention through  
50 Nutlin-3 treatment.

51

## 52 **Introduction**

53 Fragile X Syndrome (FXS) is the most common cause of inherited intellectual disability with  
54 prevalence rates estimated to be 1:5,000 in males and 1:8,000 in females [1]. FXS is one of the  
55 most common single-gene causes of autism spectrum disorder (ASD), with approximately 2 in 3  
56 of male FXS patients being clinically diagnosed with ASD [2, 3]. FXS is mainly caused by an  
57 expansion of trinucleotide repeats (CGG) to over 200 repeats in the promoter region of the *FMR1*  
58 (FMRP translational regulator 1) gene which leads to transcriptional silencing of the gene with a  
59 subsequent reduction or absence of FMR1 (also known as FMRP, Fragile X Mental Retardation  
60 Protein) [4, 5]. FMR1 is a polyribosome-associated, brain-enriched, RNA-binding protein (RBP)  
61 that selectively targets specific mRNAs and regulates their translation, transport, and stability [4-  
62 8]. In addition, it has been shown that FMR1 is involved in histone modification and chromatin  
63 remodeling [9]. Hence, FMR1 is a multifunctional protein that could be involved in diverse  
64 biological processes.

65 FMR1 deficiency has been associated with numerous co-occurring conditions including,  
66 but not limited to, intellectual and emotional disabilities ranging from learning problems to mental  
67 retardation, and mood instability to autism [10]. Better understanding of the neurobiology and  
68 pathophysiology of FXS, together with advances in FXS animal models, has paved a way for the

69 development of numerous targeted treatments for FXS. [11]. FMR1 is a multifunctional protein  
70 that regulates the expression of a large number of direct and indirect targets [8, 12, 13]. Despite  
71 the rich literature aiming to investigate short-term therapeutic outcomes of treatments, very few  
72 studies have evaluated potential long-lasting rescue effects of these treatments [11, 14]. Promising  
73 data from recent studies show that impairment of cognitive repertoire in FXS could be sustainably  
74 prevented by short-term pharmacological interventions [11, 15]. The long-lasting restoration of  
75 cognitive deficits of a rat model of FXS used in this study is associated with sustained rescue of  
76 both synaptic plasticity and altered protein synthesis. These results have raised the question whether  
77 other reported interventions have the potential to exert long-lasting therapeutic effects-

78       Even though FMR1 is highly expressed in neurons, other cells have been implicated in  
79 FXS as well [16, 17]. Studies from our and other labs have shown that FMR1 regulates adult  
80 hippocampal neurogenesis [18-25]. Neurogenesis continuously occurs in at least two specific  
81 regions of the adult mammalian brain: the subventricular zone (SVZ) of the lateral ventricles and  
82 the subgranular zone (SGZ) of the dentate gyrus (DG) in the hippocampus [26]. Adult hippocampal  
83 neurogenesis is a multi-stage process, encompassing a number of developmental phases [26].  
84 Activated neural stem cells (NSCs) or radial glia like cells (RGLs) generate intermediate neural  
85 progenitors (NPs) that subsequently differentiate into neuroblasts, immature neurons, and mature  
86 granule neurons (GCs) that finally integrate into existing circuits [27]. Adult hippocampal  
87 neurogenesis is implicated in many functional processes such as learning, memory, plasticity, and  
88 mood regulation [26] and are impaired in a number of neurological conditions including FXS [18-  
89 25]. Therefore, interventions aimed at regulating adult neurogenesis are being evaluated as  
90 potential therapeutic strategies in FXS[28]. We have previously shown that absence of FMR1  
91 leads to increased NSC proliferation but reduced neuronal differentiation in young adult (2-month-

92 old) *Fmr1* knockout (*Fmr1* KO) mice but reduced NSC proliferation and reduced neuronal  
93 differentiation in mature adult (6-month-old) *Fmr1* KO mice [19, 20]. At molecular levels, FMR1-  
94 deficient NSCs have elevated MDM2 (mouse double minute 2) protein levels and activities  
95 throughout adult ages. Treatment with Nutlin-3, a compound used for cancer clinical trial,  
96 specifically inhibits the interaction between MDM2 and its target proteins TP53 (Tumor Protein  
97 P53) and HDAC1 (Histone deacetylase 1) and rescues both adult hippocampal neurogenic and  
98 behavioral deficits in both young adult and mature adult FXS mice. However, it remains unknown  
99 whether Nutlin-3 can have long-lasting effects in FXS mice, which is a key question for therapeutic  
100 development.

101 In this study, we investigated whether Nutlin-3 treatment had sustained impact on  
102 neurogenesis and cognitive behaviors of FXS mice. We discovered that a transient treatment of  
103 young adult mice with Nutlin-3 led to long-lasting effect in both hippocampal neurogenesis and  
104 cognitive tasks in adult FXS mice. To our surprise, we found that the long-lasting effect of Nutlin-  
105 3 was not through modulating intrinsic properties of adult NSCs but rather through regulating the  
106 gene expression of the adult stem cell niche.

107

## 108 **Methods**

### 109 **Study Design**

110 The purpose of this study was to investigate the long-lasting effect of Nutlin-3 treatment on  
111 impaired neurogenesis and behavioral deficits in adult FXS mice. In addition, we aimed to  
112 determine the potential mechanisms underlying the sustained rescue effect by Nutlin-3. Based on  
113 our publications and power analysis, at least three biological replicates were used for each *in vitro*  
114 or *in vivo* biochemical and histological analysis, whereas a sample size of 9 to 21 per group was

115 used for behavioral testing. The NPCs used for *in vitro* analyses were isolated from three pairs of  
116 *Fmr1* KO and WT littermates born to different parents and NPCs isolated from each animal was  
117 considered as a biological replicate. For drug treatment, animals were randomly assigned to  
118 treatment arms with approximately equivalent numbers in each group. All cell counting and  
119 behavioral analyses were performed by experimenters who were blind to the identity of the  
120 samples.

121

## 122 **Animal Studies**

123 All animal procedures were performed according to protocols approved by the University of  
124 Wisconsin-Madison Care and Use Committee. All mice were on C57B/L6 genetic background.  
125 The crossing and genotyping of these mice were carried out as described previously [19, 20].  
126 Briefly, the *Fmr1* KO;*Nestin-GFP* mice (*Fmr1*<sup>-/-</sup>;*Nestin-GFP*) were created by crossing female  
127 *Fmr1* heterozygous KO mice (*Fmr1*<sup>+/-</sup>) [29] with homozygous *Nestin-GFP* transgenic males [30].  
128 Generation of FMR1 inducible conditional mutant mice (*Fmr1*<sup>loxP/y</sup>;*Nestin-CreER*<sup>T2</sup>;*Rosa26-tdT*  
129 or *cKO*;*Cre*;*Ai14*) and tamoxifen injections to induce recombination were performed as described  
130 [21]. To induce recombination, mice (6-week old) received tamoxifen (160 mg/kg; Sigma-  
131 Aldrich) daily for 5 days as described [21]. Nutlin-3 (10 mg/kg) was dissolved in dimethyl  
132 sulfoxide, given to 2-month-old mice through intraperitoneal injections every other day for five  
133 injections, and sacrificed at either 4-months after the last injection. For *in vivo* differentiation  
134 analysis, mice also received four BrdU injections (100 mg/kg) within 12 hours at one month before  
135 sacrifice.

136

## 137 **Tissue Preparation and Immunohistochemistry**

138 Brain tissue processing and histological analysis of mouse brains were performed as described in  
139 our publications[18-21, 31]. Briefly, mice were euthanized by intraperitoneal injection of a mixture  
140 of ketamine/xylazine/acepromazine followed by transcardiac perfusion with saline and then 4%  
141 paraformaldehyde (PFA). Brains were dissected out, post-fixed overnight in 4% PFA, and  
142 equilibrated in 30% sucrose. Brain sections of 40  $\mu\text{m}$  thickness were generated using a sliding  
143 microtome and stored in a -20  $^{\circ}\text{C}$  freezer as floating sections in cryoprotectant solution (glycerol,  
144 ethylene glycol, and 0.1M phosphate buffer (pH 7.4) ,1:1:2 by volume). We performed  
145 immunohistological analysis on 1-in-6 serial floating brain sections (240  $\mu\text{m}$  apart). After staining  
146 with primary and fluorescent secondary antibodies, sections were counterstained with DAPI  
147 (1:1000; Roche Applied Science) and then mounted, coverslipped, and maintained at 4 $^{\circ}\text{C}$  in the  
148 dark until analysis.

149 The primary antibodies used were: Chicken-anti-GFP (1:1000, Invitrogen, A10262), rabbit anti-  
150 MCM2 (1:500, Cell Signaling, 4007), rabbit anti-GFAP (1:1000, Dako, Z0334), mouse anti-GFAP  
151 (1:1000, Millipore, MAB360), mouse anti-NeuN (1:500, Millipore, MAB377), rat anti-BrdU  
152 (1:1000, Abcam, ab6326)

153 Fluorescent secondary antibodies used were: goat anti-mouse 568 (1:1000, Invitrogen, A11004),  
154 goat anti-rat 568 (1:1000, Invitrogen, A11077), goat anti-rabbit 568 (1:1000, Invitrogen, A11011),  
155 goat anti-rabbit 647 (1:1000, Invitrogen, A21245), goat anti-mouse 647 (1:1000, Invitrogen,  
156 A21235), goat anti-chicken 488 (1:1000, Invitrogen, A11039), goat anti-mouse 488 (1:1000,  
157 Invitrogen, A11029).

158

### 159 ***In Vivo* Cell Quantification**

160 Quantitative analyses of adult neurogenesis were carried out using unbiased stereology method

161 through the use of a Stereo Investigator software (MBF Biosciences) as described [19, 20, 32].  
162 Briefly, Z-stack images (2 $\mu$ m interval) were acquired using an AxioImager Z2 ApoTome confocal  
163 microscope (Plan-APOCHROMAT, 20X, numerical aperture=0.8; Zeiss). The measured  
164 thickness of the sections were  $\sim$ 30  $\mu$ m. The cell numbers were quantified by random sampling one  
165 in six coronal serial sections (240  $\mu$ m apart) encompassing the entire hippocampus, with 3  $\mu$ m  
166 guard zones on each side. Schaeffer's coefficient of error (CE) <0.1 was required for each type of  
167 cell quantification. The experimenter was blinded to the identity of the samples. The total numbers  
168 of GFP+GFAP+ cells in the dentate gyrus of each animal were counted. Then, the percentage of  
169 activated and proliferating NSCs were determined by co-localizing of GFP+GFAP cells with cell  
170 cycle marker, MCM2. Cell lineage analysis was performed as described [19]. Briefly, at least 100  
171 BrdU<sup>+</sup> cells in the Z-stacks of each mouse were randomly selected, and their co-localization with  
172 cell-lineage marker, NeuN, was determined using Stereo Investigator.

173

#### 174 **Novel Location Recognition Test**

175 This test measures spatial memory through an evaluation of the ability of mice to recognize the  
176 new location of a familiar object with respect to spatial cues. The experimental procedure was  
177 carried out as described previously [19, 20]. Briefly, mice were handled for approximately 5 min  
178 a day for a maximum of 5 days prior to the experiment. Testing consisted of five 6-min trials, with  
179 a 3-min intertrial interval between each trial. All procedures were conducted during the light cycle  
180 of the animal between 10 a.m. and 4 p.m. Before the trial session, mice were brought into the  
181 testing room and were allowed to acclimate for at least 30 minutes. During the intertrial interval,  
182 the mouse was placed in a holding cage, which remained inside the testing room. In the first trial  
183 (Pre-Exposure), each mouse was placed individually into the center of the otherwise empty open



184 arena (38.5cm Long×38.5cm wide, and 25.5cm high walls) for 6 min. For the next three trials  
185 (Sample Trials 1-3), two identical objects were placed equidistantly from the arena wall in the  
186 corners against the wall with the colored decal. Tape objects to the floor of the arena. Then, each  
187 mouse was placed individually into the center of the arena and was allowed to explore for 6  
188 minutes. At the end of the trial, the mouse was removed and returned to the home cages for 3  
189 minutes. In the last trial (Test), one of the objects was moved to a novel location, and the mouse  
190 was allowed to explore the objects for 6 minutes, and the total time spent exploring each object  
191 was measured. During the test phase, exploration time was defined as any investigative behavior  
192 (i.e., head orientation, climbing on, sniffing occurring within < 1.0 cm) or other motivated direct  
193 contact occurring with each object. To control for possible odor cues, objects were cleaned with  
194 70% ethanol solution at the end of each trial and the floor of the arena wiped down to eliminate  
195 possible scent/trail markers. During the test phase, two objects were wiped down prior to testing  
196 so that the objects would all have the same odor. Based on a previous study [33], the discrimination  
197 index was calculated as the percentage of time spent investigating the object in the new location  
198 minus the percentage of time spent investigating the object in the old location: discrimination index  
199 = (Novel Location exploration time/total exploration time × 100) – (old Location exploration  
200 time/total exploration time × 100). A higher discrimination index is considered to reflect greater  
201 memory retention for the novel location object. All experiments were videotaped and scored by  
202 scientists who were blinded to experimental conditions to ensure accuracy.

203

#### 204 **Novel Object Recognition Test**

205 This test is based on the natural propensity of rodents to preferentially explore novel objects over  
206 familiar ones. The experimental procedure was carried out as described previously [19, 20].

207 Briefly, mice were handled for approximately 5 min a day for a maximum of 5 days prior to the  
208 experiment. The test was conducted during the light cycle of the animal between 10 a.m. and 4  
209 p.m. Before the trial or test phase, mice were brought into testing room and were allowed to  
210 acclimate for at least 30 minutes. On the first day, mice were habituated for 10 min to the V-maze,  
211 made out of black Plexiglas with two corridors (30cm Long  $\times$  4.5cm wide, and 15cm high walls)  
212 set at a 90-degree angle, in which the task was performed. On the second day, mice were put back  
213 in the maze for 10 min, and two identical objects were presented. 24 hours later, one of the familiar  
214 objects was replaced with a novel object, and the mice were again placed in the maze and were  
215 allowed to explore for 10 min, and the total time spent exploring each of the two objects (novel  
216 and familiar) was measured. During the test phase, the novel and familiar objects were wiped down  
217 prior to testing so that the objects would all have the same odor and exploration time was defined  
218 as the orientation of the nose to the object at a distance of less than 2 cm. The discrimination index  
219 was calculated as the difference between the percentages of time spent investigating the novel  
220 object and the time spent investigating the familiar objects: discrimination index = (novel object  
221 exploration time/total exploration time  $\times$  100) – (familiar object exploration time/total exploration  
222 time  $\times$  100). A higher discrimination index is considered to reflect greater memory retention for  
223 the novel object. All experiments were videotaped and scored by scientists who were blinded to  
224 experimental conditions to ensure accuracy.

225

## 226 **Adult NSPC Isolation and Analyses**

227 NSPCs were isolated from the pooled DG tissue dissected from two 6-month-old male mice using  
228 our published method [34] [20]. NSPCs were cultured as described previously [34]. Proliferation  
229 and differentiation of NPCs were analyzed as described [19]. We used only early passage cells

230 (between passages 4 and 10) and only the same passage numbers of wild-type and *Fmr1* KO cells.  
231 For each experiment, triplicate wells of cells were analyzed, and results were averaged as one data  
232 point (n = 1). At least three independent biological replicates were used (n = 3) for statistical  
233 analyses.

234 The primary antibodies used were Mouse-anti-Tuj1 (1:1000, Covance, 435P) and rat anti-BrdU  
235 (1:3000, Abcam, ab6326)

236 Fluorescent secondary antibodies used were goat anti-mouse 568 (1:2000, Invitrogen, A11004)  
237 and goat anti-rat 568 (1:2000, Invitrogen, A11077)

238

### 239 **RNA Isolation and RNA-seq**

240 Freshly dissected hippocampal tissue was immediately frozen on dry ice. For RNA isolation, Trizol  
241 was added to frozen tissue followed by homogenization using a Polytron (vondor?). RNA was  
242 isolated from TRIzol samples using the TRIzol Reagent following the manufacturer's instructions.  
243 RNA quality assessment, library construction, library quality control and sequencing were  
244 performed by Novogene Bioinformatics Institute (Sacramento, CA, USA). Briefly, the quality,  
245 size, and concentration of the isolated RNA were analyzed using agarose gel electrophoresis,  
246 nanodrop, and an Agilent 2100 Bioanalyzer. Twelve cDNA libraries were constructed with three  
247 biological replicates for each condition: WT-veh, KO-veh, WT-Nut3 , and KO-Nut3. Messenger  
248 RNA was purified from total RNA using poly-T oligo-attached magnetic beads. After  
249 fragmentation, the first strand cDNA was synthesized using random hexamer primers followed by  
250 the second strand cDNA synthesis. The library was ready after end repair, A-tailing, adapter  
251 ligation, size selection, amplification, and purification (Novogene, Sacramento, CA, USA).  
252 Library quality was assessed by Qubit 2.0, Agilent 2100, and qPCR. The libraries were clustered

253 and sequenced on an Illumina Novaseq 6000 on an S4 flow cell. The 150 bp paired-end reads were  
254 generated after clustering of the index-coded samples. About 20-30 million reads were obtained  
255 for each sample.

256

## 257 **Bioinformatics Analysis**

258 FastQC was used to perform quality check of .fastq reads. Paired end reads were mapped to  
259 reference genome (mm10) using STAR. Raw count matrix was normalized by correcting for  
260 library size using DESeq2 R package (**Additional file 1**). Differential expression analysis was  
261 performed by using Dseq2 R package (**Additional file 1**). Adjusted P-value < 0.05 were used as  
262 cutoffs for differential expression. GO term enrichment was analyzed using Enricher (  
263 <https://maayanlab.cloud/Enrichr>)[35] and plotted using GOplot[36]. Transcription factor  
264 enrichment analysis and network were performed using ChEA3  
265 (<https://maayanlab.cloud/chea3>)[37] and average integrated ranks across all libraries. Submission  
266 of RNA-seq data to Gene Expression Omnibus (GEO) is in process. §

267

## 268 **Real-time PCR Assay**

269 Real-time PCR was performed using standard methods as described [19]. The first-strand cDNA  
270 was generated by reverse transcription with Oligo (dT) primer (Roche). To quantify the mRNA  
271 levels using real-time PCR, aliquots of first-stranded cDNA were amplified with gene-specific  
272 primers and Power SYBR Green PCR Master Mix (Bio-Rad) using a Step-1 Real-Time PCR  
273 System (Applied Biosystems). The PCR reactions contained 1µg of cDNA, Universal Master Mix  
274 (Applied Biosystems), and 10µM of forward and reverse primers in a final reaction volume of  
275 20µL. The data analysis software built in with the 7300 Real-Time PCR System calculated the

276 mRNA level of different samples. The sequences of primers used for Real-time PCR reactions in  
277 mouse species are listed in **Additional file 2: Table S1**.

278

## 279 **Western Blotting Analyses**

280 Protein samples were separated on SDS-PAGE gels (Bio-Rad), transferred to PVDF membranes  
281 (Millipore), and incubated with primary antibodies. The antibodies include p-  
282 MDM2(Ser166,1:1000, Novus Biologicals, NBP1-51396), HDAC1(1:1000, BioVersion, 3601-  
283 30), Acetyl-H3 (1:1000,Millipore, 06-599), Histone H3 (1:1000, Cell Signaling, 9715S), and  
284 GAPDH (1:5000,Thermo Scientific, MA5-15738). After incubation with fluorescence-labeled  
285 secondary antibodies (Li-CoR), the membranes were imaged using Li-CoR and quantification was  
286 performed using Image Studio Lite software. The amount of loading protein (20 $\mu$ g) was  
287 determined by the linear range of the target proteins (10 $\mu$ g-40 $\mu$ g) using Li-CoR system as previous  
288 described [19]. At least three independent blots were used for statistical analysis.

289

## 290 **Statistical Analysis**

291 All experiments were randomized and blinded to scientists who performed quantification.  
292 Statistical analysis was performed using ANOVA and Student's t-test, unless specified, with the  
293 GraphPad Prism software 9. Two tailed and unpaired t-test was used to compare two conditions.  
294 Two-way ANOVA with Tukey's post hoc analysis was used for analyzing multiple groups. All  
295 data were shown as mean with standard error of mean (mean  $\pm$  SEM). Probabilities of  $P < 0.05$  were  
296 considered as significant.

297

## 298 **RESULTS**

299 **Transient Nutlin-3 treatment has long-lasting rescue effect on impaired**  
300 **hippocampal neurogenesis in *Fmr1* KO mice.**

301 We have previously shown that young adult (2-month-old) *Fmr1* KO mice exhibited elevated NSC  
302 activation and impaired neurogenesis and mature adult (6-month-old) *Fmr1* KO mice exhibited  
303 reduced NSC activation and impaired neurogenesis in the hippocampus, which can be normalized  
304 to WT levels immediately after a 10-day treatment by a specific MDM2 inhibitor Nutlin-3 [19,  
305 20]. To assess the potential of MDM2 inhibition as a therapeutic treatment, a critical question  
306 remained is whether Nutlin-3 treatment has long-lasting rescue effects. We thus decided to  
307 investigate whether a transient Nutlin-3 treatment could have persistent therapeutic effect on NSC  
308 activation and adult neurogenesis in FXS mouse models.

309 We crossed *Fmr1* mutant mice with *Nestin*-GFP (green fluorescent protein) mice in which  
310 GFP expression is driven by the promotor of a neural stem and progenitor cell marker NESTIN to  
311 create the *Fmr1* KO;*Nestin*-GFP double transgenic mice as described previously [19]. We treated  
312 2-month-old *Fmr1* KO (*Fmr1*<sup>-/-</sup>;*Nestin*-GFP) and littermate wild-type (*Fmr1*<sup>+/-</sup>;*Nestin*-GFP) mice  
313 with either vehicle or Nutlin-3 (10 mg/kg) every other day over 10 days (total 5 injections) as we  
314 have done previously [19, 20] and analyzed them at 4-months after the last injections, when the  
315 mice were 6-month-old (**Fig. 1a**). Glial fibrillary acidic protein (GFAP) is a radial glia marker  
316 expressed in both quiescent and activated adult hippocampal NSCs (**Fig. 1b**) [38]. To determine  
317 activation of NSCs, we used the cell cycle marker minichromosome maintenance complex  
318 component 2 (MCM2; **Fig. 1b**). We quantified the percentage of activated (GFP<sup>+</sup>GFAP<sup>+</sup>MCM2<sup>+</sup>)  
319 NSCs over total (GFP<sup>+</sup>GFAP<sup>+</sup>) NSCs in *Fmr1* KO and WT mice. We found that *Fmr1* KO mice  
320 treated with vehicle at 2-month of age exhibited reduced NSC activation at 6-month of age  
321 compared to WT with the same vehicle treatment (**Fig. 1c**), which is consistent with our previous

322 finding on 6-month-old *Fmr1* KO mice [20]. Similarly to what we have published before [19, 20],  
323 Nutlin-3 treatment had no significant effect on WT mice (**Fig. 1c**). In contrast, *Fmr1* KO mice  
324 treated with Nutlin-3 at 2-month of age showed no significant difference in NSCs activation at 6-  
325 month of age compared to WT mice treated with either vehicle or Nutlin-3 (**Fig. 1c**). Therefore, a  
326 10-day transient Nutlin-3 treatment of young adult *Fmr1* KO mice has long-lasting rescue effect  
327 on adult hippocampal NSC activation, which persists for at least 4 months.

328 We then assessed whether the therapeutic effect of Nutlin-3 on neuronal differentiation  
329 [19, 20] could persist long after treatment. Thus, we injected 2-month-old *Fmr1* KO (*Fmr1*<sup>-/-</sup>)  
330 mice and WT (*Fmr1*<sup>+/-</sup>) littermates with Nutlin-3 as described above (**Fig. 1a**) [19]. At 5-month  
331 of age, the mice received four injections of a synthetic thymidine analogue bromodeoxyuridine  
332 (BrdU) over a 12-hour period to pulse label proliferating NSCs and progenitors in the adult DG  
333 and were sacrificed at 4 weeks after BrdU injections (6-month of age) for differentiation analysis  
334 (**Fig. 1a**) [19]. To identify the fate of the BrdU-labeled NSPCs, we performed co-immunostaining  
335 using antibodies against mature neuronal marker NeuN (neuronal nuclei antigen or RBFOX3) and  
336 BrdU and quantified the percentage of neuronal differentiation (BrdU<sup>+</sup>NeuN<sup>+</sup>/BrdU<sup>+</sup>) (**Fig. 1d**).  
337 We found that *Fmr1* KO mice treated with vehicle showed a significant reduction in neuronal  
338 differentiation compared to WT counterparts treated with either vehicle or Nutlin-3 (**Fig. 1e**),  
339 which is consistent as what has been reported previously [20]. In contrast, 6-month-old *Fmr1* KO  
340 mice treated with Nutlin-3 at 2-month of age showed elevated neuronal differentiation level  
341 comparable to that of the WT mice (**Fig. 1e**). Nutlin-3 administration did not show significant  
342 effects on neurogenesis of WT mice (**Fig. 1e**). Therefore, transient treatment of *Fmr1* KO mice  
343 with Nutlin-3 at young adult ages could prevent impairment of neuronal differentiation at mature

344 adult mice. In summary, our findings have revealed a long-lasting therapeutic effect of Nutlin-3  
345 on impaired NSC activation and neuronal differentiation in a FXS mouse model.

346

### 347 **Transient Nutlin-3 treatment has endured corrective effect on cognitive deficit in** 348 **FXS mouse models**

349 We have previously shown that *Fmr1* KO mice exhibited deficits in hippocampus-dependent  
350 cognitive functions [19-21, 39] and Nutlin-3 treatment reversed impaired spatial learning assessed  
351 by a novel location recognition test (NLR) and defective cognitive function assessed by a novel  
352 object recognition (NOR) test at one month after treatment [19, 20]. Since our current study has  
353 revealed a persistent therapeutic effect of Nutlin-3 on impaired NSCs activation and neurogenesis  
354 in *Fmr1* KO mice (**Fig. 1**), we decided to investigate whether the Nutlin-3-dependent restoration  
355 of cognitive deficit is also long-lasting.

356 First, to confirm that selective deletion of FMR1 from NSCs in young adult mice leads to  
357 long-lasting impaired performances on hippocampus-dependent learning tasks, we generated  
358 tamoxifen-inducible *Fmr1* conditional knockout (cKO;CreER<sup>T2</sup>;Ai14) triple transgenic mice by  
359 crossing *Fmr1*-floxed (*Fmr1*<sup>fl/fl</sup>, or cKO) mice with inducible *Nestin* promotor-driven Cre  
360 transgenic mice (*Nes-CreER<sup>T2</sup>*) and *Rosa26-STOP-tdTomato* (Ai14) reporter mice as described  
361 previously [19] (**Additional file 3: Fig. S1a**). We found that targeted deletion of FMR1 from NSCs  
362 and their progenies at 2-month of age led to learning deficits at 6-month of age (**Additional file 3:**  
363 **Fig. S1b-d**), which corroborated our previous findings [19, 21]. More importantly, transient  
364 treatment of *cKO;CreER<sup>T2</sup>;Ai14* mice with Nutlin-3 at 2-month of age led to restoration of  
365 cognitive function when assessed at 6-month of age (**Additional file 3: Fig. S1b-d**). Therefore



366 transient Nutlin-3 treatment in young adult mice with selective deletion of FMR1 from adult new  
367 neurons has long lasting effect.

368 We then treated 2-month-old *Fmr1* KO mice and their WT littermates with either vehicle  
369 or Nutlin-3 and analyzed their behaviors 4 months later (**Fig. 2a**). Consistent with our previous  
370 findings, *Fmr1* KO mice treated with vehicle exhibited impaired performance in spatial learning  
371 on the NLR test and defective learning on the NOR test (**Fig. b-e**)[20]. In contrast, Nutlin-3  
372 administration rescued the impaired performances of *Fmr1* KO mice in both NLR (**Fig. 2c**) and  
373 NOR (**Fig. 2e**) to the wild-type levels without significant effect on wild-type mice (**Fig. 2c,e**).  
374 Therefore, a transient Nutlin-3 treatment of FMR1-deficient mice at young adulthood could rescue  
375 impaired cognitive performance for at least 4 months.

376

377 **Transient treatment with Nutlin-3 does not have persistent effect on intrinsic**  
378 **properties of adult neural stem/progenitor cells.**

379 We next sought to reveal the molecular mechanisms that are associated with Nutlin-3- induced  
380 enduring rescue of impaired hippocampal neurogenesis and related cognitive functions. Adult  
381 NSCs and adult hippocampal neurogenesis are regulated by both intrinsic and extrinsic factors  
382 [40]. To determine whether Nutlin-3 treatment acted through NSC intrinsic pathways, we decided  
383 to analyze the neural stem/progenitor cells (NSPCs) isolated from the hippocampus of 6-month-  
384 old *Fmr1* KO and littermate WT mice treated with either vehicle or Nutlin-3 at 2-month of age  
385 (**Fig. 3a**) using our published methods [34]. We used BrdU pulse labeling to assess NSPC  
386 proliferation and found that *Fmr1* KO NSPCs exhibited reduced BrdU incorporation rate compared  
387 to WT NSPCs (**Fig. 3b,d**), consistent with our published results on NSPCs isolated from 6-month-  
388 old *Fmr1* KO mice [20]. Surprisingly, Nutlin-3 treatment did not rescue the impaired proliferation

389 of *Fmr1* KO cells (**Fig. 3d**). We then assessed NPSC neuronal differentiation using an antibody  
390 for immature neuron,  $\beta$ III-tubulin (Tuj1) and found that NSPCs isolated from *Fmr1* KO mice at  
391 4-months after either Nutlin-3 or vehicle injection exhibited similarly reduced neuronal  
392 differentiation (**Fig. 3c,e**). We have previously shown that NSCs isolated from 6-month old mice  
393 exhibited elevated phosphorylated MDM2 (P-MDM2, the active form of MDM2), acetylated  
394 Histone H3, and HDAC1 levels [20] We therefore assessed the levels of these proteins and found  
395 that NSPCs isolated from KO mice exhibited increased P-MDM2 protein levels, elevated H3  
396 acetylation, and reduced HDAC1 levels, consistent to our published results (**Fig. 3f-k**) [20]. More  
397 importantly, treatment of Nutlin-3 at 2-month of age did not alter the levels of these proteins in the  
398 NSPCs isolated from 6-month-old mice (**Fig. 3f-k**). Therefore, these data revealed that long-lasting  
399 effect of Nutlin-3 on hippocampal NSPCs was unlikely due to intrinsic changes in NSPCs.

400

#### 401 **Transient Nutlin-3 treatment leads to significant and specific gene expression** 402 **changes in *Fmr1* KO hippocampus**

403 Since transient Nutlin-3 treatment did not have significant rescue effect on NSPCs isolated 4-  
404 months later, we reckoned that Nutlin-3 might exert its long-lasting impact on hippocampal  
405 neurogenesis through modulating stem cell niche in the hippocampus. To explore the potential  
406 regulatory mechanisms, we injected 2-month-old *Fmr1* KO and WT control mice with Nutlin-3 or  
407 vehicle and harvested the hippocampi at 4-months post-treatment for transcriptomic analysis in  
408 triplicates (**Fig. 4a**). Total sequencing reads generated for each sample were between 21 and 26  
409 million ( $21 \times 10^6 < \text{TRs} < 26 \times 10^6$ ) (**Additional file 2: Table S2**). More than 94% reads were  
410 uniquely mapped to the mouse genome, which corresponds to more than  $25 \times 10^3$  genes (**Additional**  
411 **file 2: Table S2,3**). We evaluated the distribution of read counts across the samples and found that

412 the overall density distribution of raw log-intensities exhibited a highly consistent pattern  
413 **(Additional file 3: Fig. S2).**

414 Next, we performed differential expression analysis to identify significantly deregulated  
415 genes among the four experimental groups. Adjusted P-value < 0.05 were used as cutoffs for  
416 differential expression. We identified no differentially expressed genes (DEGs) between vehicle-  
417 treated and Nutlin-3-treated WT mice, consistent with a lack of effect by Nutlin-3 on WT mice  
418 shown in our published results [19, 20] and current neurogenic and behavioral data (**Fig. 1-3, Fig.**  
419 **4b,c; Additional file 2: Table S4**). We identified 21 DEGs between vehicle-treated *Fmr1* KO  
420 (KO-Veh) and WT mice (WT-Veh), of which 13 DEGs were downregulated and 8 genes were  
421 upregulated (**Fig. 4c; Additional file 2: Table S4**). Surprisingly, we found that the most significant  
422 gene expression changes were between vehicle treated and Nutlin-3-treated *Fmr1* KO mice (KO-  
423 Veh vs KO-Nut3) (**Fig. 4c; Additional file 2: Table S4**). Out of a total 237 DEGs (KO-Veh vs  
424 KO-Nut3), 6 gene were downregulated and 231 genes were upregulated in Nutlin-3 treated KO  
425 mice (**Fig. 4c; Additional file 2: Table S4**). Only 1 DEG, gene Gm21887 or *Erdr1* (erythroid  
426 differentiation regulator 1), was shared between these any two groups of DEGs (**Fig. 4c;**  
427 **Additional file 2: Table S4**). Therefore transient Nutlin-3-triggered significant gene expression  
428 changes in KO mice but did not make gene expression in KO mice to be more like that in WT  
429 mice.

430 To understand the biological significance of DEGs found in *Fmr1* KO mice treated with  
431 Nutlin-3, we performed Gene Ontology (GO) analysis using three categories of term analysis:  
432 Biological Pathway, Cell Component and Molecular Function (**Additional file 2: Table S5**). We  
433 generated circle plots to demonstrate specific enrichment and the directionality of the gene  
434 expression changes within each GO category (**Fig. 5a**). The DEGs were generally enriched for

435 extra cellular matrix, cell membrane proteins and secreted factors (**Fig. 5a; Additional file 2:**  
436 **Table S5**) known to be key components of adult neurogenic niche [41-44], including the well-  
437 known BMP and TGF $\beta$  signaling pathway [45] and IGF2 pathway [46]. In each GO category there  
438 was a robust upregulation of the DEGs for the enriched terms (**Fig. 5a**).

439 Because the enriched terms have shown strong potential in stem cell regulation through  
440 modulating stem cell niche [41-44], we next selected a number of candidate DEGs from each group  
441 and validated their differential expression in KO-Nut3 compared to KO-Veh using quantitative  
442 polymerase chain reaction (qPCR) analysis. Administration of Nutlin-3 in *Fmr1* KO mice led to  
443 significant changes in the expression levels of genes associated to extracellular matrix (*Col8a1*  
444 and *Timp3*), cell membrane (*Aqp1* and *Tmem72*) and secreted factors (*Angptl2*, *Enpp2*, *BMP6* and  
445 *Igf2*) compared to WT littermates (**Fig. 5b-j**).

446 To further explore how these gene expression changes might have happened, we next  
447 performed transcription factor (TF) target enrichment analysis to identify potential upstream TFs  
448 responsible for observed changes in gene expression of Nutlin-3-treated *Fmr1* KO mice. Our  
449 analysis showed that the top TFs are mainly involved in stem cell fate specification (such as  
450 MEOX1, MEOX2, PRRX1, BNC2, SOX18 and TWIST1) [47-51] and/or extra cellular matrix  
451 organization (such as HEYL, TBX18, PRRX1, PRRX2 and TCF21) [52-54] (**Fig. 6a; ;Additional**  
452 **file 3: Fig. S3**). We then assessed the relationship among our top TFs using a published TF  
453 network. We found that our top TFs related to Nutlin-3 treatment in KO mice showed a high level  
454 of interactions (**Fig. 6b**). Together, our transcriptomic analysis of the hippocampal tissue supports  
455 that the long-lasting rescue effects of Nutlin-3 treatment on impaired adult neurogenesis and  
456 dependent cognitive functions of *Fmr1* KO mice might be through modulating the adult neural  
457 stem cell niche.

458

## 459 **Discussion**

460 This study sought to test the hypothesis that transient therapeutic intervention can produce long-  
461 lasting beneficial effects on cognitive functions in a mouse model of FXS. Our results demonstrate  
462 that a transient Nutlin-3 treatment of young adults for 10-days restored impaired hippocampal  
463 neurogenesis and related cognitive abilities in *Fmr1* KO mouse for at least 4 months after treatment  
464 cessation. Together with our publications [19, 20], these findings indicate not only that brief  
465 Nutlin-3 treatment rescues the neurogenic and cognitive deficits in adult FXS mice, but also that  
466 these beneficial effects are sustained long after the end of treatment. Our data also suggest that  
467 Nutlin-3 treatment during early adulthood time window might establish the normal adult NSC  
468 niche required for intact neurogenesis and cognitive performances in the absence of FMR1.

469 Numerous therapeutic alternatives including newly developed compounds or repurposed  
470 drugs have been proposed for FXS [19, 55]. There are many advantages of drug repurposing in the  
471 treatment of disease, including shortening the time frame and reduced cost associated with new  
472 drug development [56]. When assessing the feasibility of initiating treatments, an obvious concern  
473 is the resulting toxicity from long-term administration. For these reasons, there has been extensive  
474 interest in the possibility of repurposing drugs with potentially long-lasting therapeutic effects.  
475 However, only very few studies have assessed persistent effect of treatment long after treatments  
476 are stopped. In a recent study, minocycline treatment effect has lasted for 4 weeks in young FXS  
477 mice but not in adult FXS mice [14]. In another study, transient treatment of FXS rats with  
478 lovastatin at 4 weeks of age for 5 weeks prevented the emergence of cognitive deficits in object-  
479 place recognition and object-place-context recognition[11]. The authors show that corrective effect  
480 has sustained for at least 3 months (the last time point tested) after treatment termination and the

481 observed restoration of normal cognitive function is associated with sustained rescue of both  
482 synaptic plasticity and altered protein synthesis[11]. One promising candidate for drug reproposing  
483 is a group of MDM2 inhibitors and its prototype is Nutlin-3. Nutlin-3 is a small molecule that  
484 specifically inhibits MDM2, an E3 ubiquitin ligase, and the best known MDM2 targets is tumor  
485 suppressor TP53, therefore Nutlin-3 and its derivative have been worked on extensively and used  
486 in clinical trial for cancer treatment [57]. Our lab has found that, in adult NSPCs, FMR1 directly  
487 regulates the expression levels and activities of MDM2, which targets TP53 and HDAC1 [19, 20].  
488 Our published studies have shown that Nutlin-3 administration at a dosage significantly lower than  
489 those used for cancer treatment rescues impaired hippocampal neurogenesis and cognitive  
490 functions in either 2-month-old young adult FXS mice or 6-month-old mature adult FXS mice  
491 analyzed shortly after the treatment [19, 20]. However, the long-lasting effect of Nutlin-3 was  
492 unknown. Our current study has addressed this important question and taken one step further to  
493 potential therapeutic applications of MDM2 inhibition for treatment of FXS.

494         Understanding the molecular mechanism underlying drug action is important for both  
495 therapeutic application and improvement of drug development. To investigate the mechanism  
496 underlying the long-lasting effect of Nutlin-3, we first determined whether this effect was due to  
497 persistent changes in intrinsic properties of NSCs by using primary NSPCs isolated from *Fmr1*  
498 KO or WT mouse hippocampus. We have previously shown that NSPCs isolated from 2-month-  
499 old *Fmr1* KO hippocampus had reduced *TP53* gene expression, increased proliferation, and  
500 reduced neuronal differentiation, which can be corrected by Nutlin-3 treatment [19]. *TP53* gene  
501 encodes a transcription factor TP53 regulating a network of target genes that play roles in various  
502 cellular processes including but limited to apoptosis, cell cycle arrest, genomic integrity,  
503 metabolism, redox biology and stemness [58]. p53 binds DNA in a sequence-specific manner and

504 recruits transcriptional machinery components to activate or suppress expression of a network of  
505 target genes [59]. TP53 has also been shown to regulate gene expression through epigenetic  
506 mechanisms [60-62], which may lead to long-lasting alteration in gene expression. We therefore  
507 hypothesized that Nutlin-3 treatment may exert sustained therapeutic effect on FXS mouse model  
508 through modulating epigenetic pathways in NSPCs. To our surprise, our results indicate that  
509 transient Nutlin-3 treatment did not lead to persist corrections in active MDM2 levels nor  
510 proliferation and differentiation of *Fmr1* KO NSPCs. This suggests that, unlike the immediate  
511 response to Nutlin-3 treatment, the long-lasting therapeutic effect of Nutlin-3 on neurogenesis  
512 might not be mediated through modulating NSPC intrinsic properties [19, 20]. Because adult  
513 neurogenesis is regulated by both NSC intrinsic pathways and extrinsic stem cell niche [63], we  
514 performed gene expression profile analysis of *Fmr1* KO and WT hippocampal tissue. Nutlin-3  
515 treatment did not change the gene expression profile of WT hippocampus which is supported by  
516 our previous findings [19, 20]. On the other hand, Nutlin-3-treated KO mice mounted persistent  
517 and significant gene expression changes compared to vehicle-treated KO mice and WT mice.  
518 Among DEGs, we found mRNAs of proteins associated to extra cellular matrix, cell membrane  
519 and secreted factors, many of which have been shown to regulate adult neurogenesis [42-44]. For  
520 example, genes in TGF $\beta$  and BMP signaling are upregulated in Nutlin-3-treated KO mice, which  
521 we have confirmed using qPCR. It has been shown that TGF $\beta$  and BMP activation in adult NSC  
522 niche can activate adult neurogenesis [64, 65]. In addition, *Igf2* mRNA expression levels were  
523 significantly higher in Nutlin-3-treated KO hippocampus compared to either Vehicle-treated KO  
524 hippocampus or WT mice. IGF2 which has also been shown to promote adult NSC proliferation  
525 and neurogenesis[46].

526           One potential limitation of this study is that we have not defined whether an age range or  
527 a critical period exists for the initial Nutlin-3 treatment to achieve the long-lasting effectiveness of  
528 Nutlin-3 treatment. Future experiments on Nutlin-3 administration time at younger or older ages  
529 than 2 months should be considered. In addition, we showed that the beneficial effects of Nutlin-  
530 3 on impaired neurogenesis and cognition of FXS mice sustained for at least 4 months. Whether  
531 the effect lasts for a longer period or even for the rest of the animal's life will need to be addressed  
532 in future studies. Furthermore, we have assessed adult neurogenesis-dependent behaviors. It is  
533 possible that Nutlin-3 also improves other aspects of behavioral deficits in FXS mice which is  
534 independent of adult neurogenesis, therefore it will be beneficial to assess whether the beneficial  
535 effects of Nutlin-3 can be generalized to other forms of cognitive and behavior functions found in  
536 FXS. Finally, although our transcriptomic analysis has provided important clue for the long-term  
537 effect of Nutlin-3 treatment, a comprehensive assessment of gene expression and epigenetic  
538 profiles of neurogenic niche will be needed to fully understand the molecular basis of persistent  
539 effect of Nutlin-3.

540

## 541 **Conclusions**

542 In summary, our findings indicate that a brief Nutlin-3 treatment of young adult FXS mice has a  
543 long-lasting therapeutic effect on both neurogenesis and behaviors and that the sustained beneficial  
544 effect might be exerted through modulating adult NSC niche. Our observation strengthens the idea  
545 that Nutlin-3 is one of the ideal candidates for optimal therapy with the minimal toxicity in a  
546 targeted therapeutic approach. The findings provide proof-of-concept evidence that FXS, and



547 perhaps neurodevelopmental disorders more generally, may be amenable to transient, early  
548 intervention to permanently restore normal cognitive functions.

549

## 550 **Abbreviations**

551 **ASD**: autism spectrum disorder, **ANOVA**: Analysis of variance, **BrdU**: Bromodeoxyuridine,  
552 **cKO**: Conditional knockout, **DEG**: Differentially expressed gene, **CE**: Coefficient of error, **DG**:  
553 Dentate gyrus, **ECM**: Extracellular matrix, **Erdr1**: Erythroid differentiation regulator 1, **Fig**:  
554 Figure, **Fmr1**: Fragile x mental retardation protein 1, **FMRI**: Translational regulator 1 (official  
555 name), **FMRP**: Fragile x mental retardation protein (previous name), **FXS**: Fragile x syndrome,  
556 **GAPDH**: Glyceraldehyde-3-phosphate dehydrogenase, **GC**: Granule cell, **GFP**: Green  
557 fluorescent protein, **GFAP**: Glial fibrillary acidic protein, **GO**: Gene ontology, **HDAC1**: Histone  
558 deacetylase 1, **KO**: Knockout, **qPCR**: quantitative polymerase chain reaction, **MCM2**:  
559 Minichromosome maintenance complex component 2, **MDM2**: mouse double minute 2, **NeuN**:  
560 Neuronal nuclei antigen, **NIH**: National institute of health, **NLR**: Novel location recognition,  
561 **NOR**: Novel object recognition, **NSPC**: Neural stem/progenitor cell, **NSC**: Neural stem cell, **NP**:  
562 Neural progenitors, **Nut3**: Nutlin3, **p53**: Protein, **PFA**: Paraformaldehyde **RBFOX3**: RNA  
563 binding fox-1 homolog 3, **RGL**: Radial glial like, **SGZ**: Subgranular zone, **SVZ**: Subventricular  
564 zone, **TF**: Transcription factor, **Veh**: Vehicle, **WT**: Wild type

565

## 566 **ACKNOWLEDGMENTS**

567 We thank Y. Xing, K. Schoeller, J. Le, and ? for technical assistance, J. Panksepp, D. Bolling and  
568 MM Eastwood, K. Knobel at the Waisman IDD Model Core, UW-Madison Biotechnology Center

569 for next generation sequencing services. This work was supported by grants from the National  
570 Institutes of Health (R01MH118827, R01MH116582, R01NS105200 to X.Z., R01NS064025,  
571 R01AG067025, U01MH116492 to D. W., U54HD090256 and P50HD105353 to the Waisman  
572 Center), Jenni and Kyle Professorship to XZ, Wisconsin Distinguished Graduate Fellowship to SJ  
573

## 574 **AUTHOR CONTRIBUTIONS**

575 XZ conceived the concept. XZ, SJ, YL designed and performed experiments, collected data, and  
576 analyzed data. SJ and XZ wrote the manuscript. JS and DW performed bioinformatics analysis  
577

## 578 **DECLARATION OF INTERESTS**

579 X.Z. and Y.L. are inventors of a patent (“METHODS FOR TREATING COGNITIVE DEFICITS  
580 ASSOCIATED WITH FRAGILE X SYNDROME” United States US 9,962,380 B2). The remaining  
581 authors declare no competing interests.  
582

## 583 **References**

- 584 1. Tassone F, Long KP, Tong T-H, Lo J, Gane LW, Berry-Kravis E, Nguyen D, Mu LY, Laffin J, Bailey DB:  
585 **FMR1 CGG allele size and prevalence ascertained through newborn screening in the United**  
586 **States.** *Genome medicine* 2013, **4**(12):1-13.
- 587 2. Budimirovic DB, Kaufmann WE: **What can we learn about autism from studying fragile X**  
588 **syndrome?** *Developmental neuroscience* 2011, **33**(5):379-394.
- 589 3. Kaufmann WE, Kidd SA, Andrews HF, Budimirovic DB, Esler A, Haas-Givler B, Stackhouse T, Riley  
590 C, Peacock G, Sherman SL: **Autism spectrum disorder in fragile X syndrome: cooccurring**  
591 **conditions and current treatment.** *Pediatrics* 2017, **139**(Supplement 3):S194-S206.
- 592 4. Pieretti M, Zhang F, Fu Y-H, Warren ST, Oostra BA, Caskey CT, Nelson DL: **Absence of expression**  
593 **of the FMR-1 gene in fragile X syndrome.** *Cell* 1991, **66**(4):817-822.
- 594 5. Verkerk AJ, Pieretti M, Sutcliffe JS, Fu Y-H, Kuhl DP, Pizzuti A, Reiner O, Richards S, Victoria MF,  
595 Zhang F: **Identification of a gene (FMR-1) containing a CGG repeat coincident with a**

- 596 **breakpoint cluster region exhibiting length variation in fragile X syndrome. *Cell* 1991,  
597 **65(5):905-914.****
- 598 6. De Rubeis S, Bagni C: **Fragile X mental retardation protein control of neuronal mRNA**  
599 **metabolism: Insights into mRNA stability.** *Molecular and Cellular Neuroscience* 2010, **43(1):43-**  
600 **50.**
- 601 7. Bassell GJ, Warren ST: **Fragile X syndrome: loss of local mRNA regulation alters synaptic**  
602 **development and function.** *Neuron* 2008, **60(2):201-214.**
- 603 8. Richter JD, Zhao X: **The molecular biology of FMRP: new insights into fragile X syndrome.**  
604 *Nature Reviews Neuroscience* 2021, **22(4):209-222.**
- 605 9. Alpatov R, Lesch BJ, Nakamoto-Kinoshita M, Blanco A, Chen S, Stützer A, Armache KJ, Simon MD,  
606 Xu C, Ali M: **A chromatin-dependent role of the fragile X mental retardation protein FMRP in**  
607 **the DNA damage response.** *Cell* 2014, **157(4):869-881.**
- 608 10. Garber KB, Visootsak J, Warren ST: **Fragile X syndrome.** *European journal of human genetics*  
609 2008, **16(6):666-672.**
- 610 11. Asiminas A, Jackson AD, Louros SR, Till SM, Spano T, Dando O, Bear MF, Chattarji S, Hardingham  
611 GE, Osterweil EK: **Sustained correction of associative learning deficits after brief, early**  
612 **treatment in a rat model of Fragile X Syndrome.** *Science translational medicine* 2019, **11(494).**
- 613 12. Richter JD, Bassell GJ, Klann E: **Dysregulation and restoration of translational homeostasis in**  
614 **fragile X syndrome.** *Nature Reviews Neuroscience* 2015, **16(10):595-605.**
- 615 13. Ascano M, Mukherjee N, Bandaru P, Miller JB, Nusbaum JD, Corcoran DL, Langlois C,  
616 Munschauer M, Dewell S, Hafner M: **FMRP targets distinct mRNA sequence elements to**  
617 **regulate protein expression.** *Nature* 2012, **492(7429):382-386.**
- 618 14. Dansie LE, Phommahaxay K, Okusanya AG, Uwadia J, Huang M, Rotschafer SE, Razak KA, Ethell  
619 DW, Ethell IM: **Long-lasting effects of minocycline on behavior in young but not adult Fragile X**  
620 **mice.** *Neuroscience* 2013, **246:186-198.**
- 621 15. Ligsay A, Hagerman RJ: **Review of targeted treatments in fragile X syndrome.** *Intractable & rare*  
622 *diseases research* 2016.
- 623 16. Bakker CE, de Diego Otero Y, Bontekoe C, Raghoe P, Luteijn T, Hoogeveen AT, Oostra BA,  
624 Willemsen R: **Immunocytochemical and biochemical characterization of FMRP, FXR1P, and**  
625 **FXR2P in the mouse.** *Experimental cell research* 2000, **258(1):162-170.**
- 626 17. Devys D, Lutz Y, Rouyer N, Bellocq J-P, Mandel J-L: **The FMR-1 protein is cytoplasmic, most**  
627 **abundant in neurons and appears normal in carriers of a fragile X premutation.** *Nature*  
628 *genetics* 1993, **4(4):335-340.**
- 629 18. Luo Y, Shan G, Guo W, Smrt RD, Johnson EB, Li X, Pfeiffer RL, Szulwach KE, Duan R, Barkho BZ:  
630 **Fragile x mental retardation protein regulates proliferation and differentiation of adult neural**  
631 **stem/progenitor cells.** *PLoS genetics* 2010, **6(4).**
- 632 19. Li Y, Stockton ME, Bhuiyan I, Eisinger BE, Gao Y, Miller JL, Bhattacharyya A, Zhao X: **MDM2**  
633 **inhibition rescues neurogenic and cognitive deficits in a mouse model of fragile X syndrome.**  
634 *Science translational medicine* 2016, **8(336):336ra361-336ra361.**
- 635 20. Li Y, Stockton ME, Eisinger BE, Zhao Y, Miller JL, Bhuiyan I, Gao Y, Wu Z, Peng J, Zhao X: **Reducing**  
636 **histone acetylation rescues cognitive deficits in a mouse model of Fragile X syndrome.** *Nature*  
637 *communications* 2018, **9(1):1-16.**
- 638 21. Guo W, Allan AM, Zong R, Zhang L, Johnson EB, Schaller EG, Murthy AC, Goggin SL, Eisch AJ,  
639 Oostra BA: **Ablation of Fmrp in adult neural stem cells disrupts hippocampus-dependent**  
640 **learning.** *Nature medicine* 2011, **17(5):559-565.**

- 641 22. Liu B, Li Y, Stackpole EE, Novak A, Gao Y, Zhao Y, Zhao X, Richter JD: **Regulatory discrimination**  
642 **of mRNAs by FMRP controls mouse adult neural stem cell differentiation.** *Proceedings of the*  
643 *National Academy of Sciences* 2018, **115**(48):E11397-E11405.
- 644 23. Pinar C, Yau S-y, Sharp Z, Shamei A, Fontaine CJ, Meconi AL, Lottenberg CP, Christie BR: **Effects**  
645 **of voluntary exercise on cell proliferation and neurogenesis in the dentate gyrus of adult**  
646 **FMR1 knockout mice.** *Brain Plasticity* 2018, **4**(2):185-195.
- 647 24. Lazarov O, Demars MP, Da Tommy Zhao K, Ali HM, Grauzas V, Kney A, Larson J: **Impaired**  
648 **survival of neural progenitor cells in dentate gyrus of adult mice lacking fMRP.** *Hippocampus*  
649 2012, **22**(6):1220-1224.
- 650 25. Eadie B, Zhang W, Boehme F, Gil-Mohapel J, Kainer L, Simpson J, Christie B: **Fmr1 knockout mice**  
651 **show reduced anxiety and alterations in neurogenesis that are specific to the ventral dentate**  
652 **gyrus.** *Neurobiology of disease* 2009, **36**(2):361-373.
- 653 26. Kempermann G, Song H, Gage FH: **Neurogenesis in the adult hippocampus.** *Cold Spring Harbor*  
654 *perspectives in biology* 2015, **7**(9):a018812.
- 655 27. Eisch AJ, Cameron HA, Encinas JM, Meltzer LA, Ming G-L, Overstreet-Wadiche LS: **Adult**  
656 **neurogenesis, mental health, and mental illness: hope or hype?** *Journal of Neuroscience* 2008,  
657 **28**(46):11785-11791.
- 658 28. Babcock KR, Page JS, Fallon JR, Webb AE: **Adult Hippocampal Neurogenesis in Aging and**  
659 **Alzheimer's Disease.** *Stem Cell Reports* 2021, **16**(4):681-693.
- 660 29. Consortium TD-BFX: **Fmr1 knockout mice: a model to study fragile X mental retardation. The**  
661 **Dutch-Belgian Fragile X Consortium.** *Cell* 1994, **78**(1):23-33.
- 662 30. Yamaguchi M, Saito H, Suzuki M, Mori K: **Visualization of neurogenesis in the central nervous**  
663 **system using nestin promoter-GFP transgenic mice.** *Neuroreport* 2000, **11**(9):1991-1996.
- 664 31. Guo W, Zhang L, Christopher DM, Teng Z-Q, Fausett SR, Liu C, George OL, Klingensmith J, Jin P,  
665 Zhao X: **RNA-binding protein FXR2 regulates adult hippocampal neurogenesis by reducing**  
666 **Noggin expression.** *Neuron* 2011, **70**(5):924-938.
- 667 32. Zhao X, van Praag H: **Steps towards standardized quantification of adult neurogenesis.** *Nat*  
668 *Commun* 2020, **11**(1):4275.
- 669 33. Contestabile A, Greco B, Ghezzi D, Tucci V, Benfenati F, Gasparini L: **Lithium rescues synaptic**  
670 **plasticity and memory in Down syndrome mice.** *The Journal of clinical investigation* 2012,  
671 **123**(1).
- 672 34. Guo W, Patzlaff NE, Jobe EM, Zhao X: **Isolation of multipotent neural stem or progenitor cells**  
673 **from both the dentate gyrus and subventricular zone of a single adult mouse.** *Nature protocols*  
674 2012, **7**(11):2005.
- 675 35. Chen EY, Tan CM, Kou Y, Duan Q, Wang Z, Meirelles GV, Clark NR, Ma'ayan A: **Enrichr:**  
676 **interactive and collaborative HTML5 gene list enrichment analysis tool.** *BMC Bioinformatics*  
677 2013, **14**:128.
- 678 36. Walter W, Sanchez-Cabo F, Ricote M: **GOplot: an R package for visually combining expression**  
679 **data with functional analysis.** *Bioinformatics* 2015, **31**(17):2912-2914.
- 680 37. Keenan AB, Torre D, Lachmann A, Leong AK, Wojciechowicz ML, Utti V, Jagodnik KM, Kropiwnicki  
681 E, Wang Z, Ma'ayan A: **ChEA3: transcription factor enrichment analysis by orthogonal omics**  
682 **integration.** *Nucleic Acids Res* 2019, **47**(W1):W212-W224.
- 683 38. Kempermann G, Jessberger S, Steiner B, Kronenberg G: **Milestones of neuronal development in**  
684 **the adult hippocampus.** *Trends in neurosciences* 2004, **27**(8):447-452.
- 685 39. Guo W, Murthy AC, Zhang L, Johnson EB, Schaller EG, Allan AM, Zhao X: **Inhibition of GSK3 $\beta$**   
686 **improves hippocampus-dependent learning and rescues neurogenesis in a mouse model of**  
687 **fragile X syndrome.** *Human molecular genetics* 2012, **21**(3):681-691.

- 688 40. Eisinger BE, Zhao X: **Identifying molecular mediators of environmentally enhanced**  
689 **neurogenesis**. *Cell and tissue research* 2018, **371**(1):7-21.
- 690 41. Scadden DT: **The stem-cell niche as an entity of action**. *Nature* 2006, **441**(7097):1075-1079.
- 691 42. Moore KA, Lemischka IR: **Stem cells and their niches**. *Science* 2006, **311**(5769):1880-1885.
- 692 43. Lutolf MP, Blau HM: **Artificial stem cell niches**. *Advanced Materials* 2009, **21**(32-33):3255-3268.
- 693 44. Kjell J, Fischer-Sternjak J, Thompson AJ, Friess C, Sticco MJ, Salinas F, Cox J, Martinelli DC,  
694 Ninkovic J, Franze K: **Defining the adult neural stem cell niche proteome identifies key**  
695 **regulators of adult neurogenesis**. *Cell stem cell* 2020, **26**(2):277-293. e278.
- 696 45. Zhang J, Li L: **BMP signaling and stem cell regulation**. *Developmental biology* 2005, **284**(1):1-11.
- 697 46. Ziegler AN, Feng Q, Chidambaram S, Testai JM, Kumari E, Rothbard DE, Constanica M, Sandovici  
698 I, Cominski T, Pang K: **Insulin-like growth factor II: an essential adult stem cell niche constituent**  
699 **in brain and intestine**. *Stem cell reports* 2019, **12**(4):816-830.
- 700 47. Sutcu HH, Ricchetti M: **Loss of heterogeneity, quiescence, and differentiation in muscle stem**  
701 **cells**. *Stem cell investigation* 2018, **5**.
- 702 48. Stevanovic M, Drakulic D, Lazic A, Ninkovic DS, Schwirtlich M, Mojsin M: **SOX Transcription**  
703 **Factors as Important Regulators of Neuronal and Glial Differentiation During Nervous System**  
704 **Development and Adult Neurogenesis**. *Frontiers in molecular neuroscience* 2021, **14**:51.
- 705 49. Francois M, Caprini A, Hosking B, Orsenigo F, Wilhelm D, Browne C, Paavonen K, Karnezis T,  
706 Shayan R, Downes M: **Sox18 induces development of the lymphatic vasculature in mice**. *Nature*  
707 2008, **456**(7222):643-647.
- 708 50. Shimosaki K, Clemenson GD, Gage FH: **Paired related homeobox protein 1 is a regulator of**  
709 **stemness in adult neural stem/progenitor cells**. *Journal of Neuroscience* 2013, **33**(9):4066-4075.
- 710 51. Panman L, Andersson E, Alekseenko Z, Hedlund E, Kee N, Mong J, Uhde CW, Deng Q, Sandberg  
711 R, Stanton LW: **Transcription factor-induced lineage selection of stem-cell-derived neural**  
712 **progenitor cells**. *Cell stem cell* 2011, **8**(6):663-675.
- 713 52. Silva AC, Pereira C, Fonseca ACR, Pinto-do-Ó P, Nascimento DS: **Bearing my heart: the role of**  
714 **extracellular matrix on cardiac development, homeostasis, and injury response**. *Frontiers in*  
715 *Cell and Developmental Biology* 2021, **8**:1705.
- 716 53. Hall BK, Miyake T: **All for one and one for all: condensations and the initiation of skeletal**  
717 **development**. *Bioessays* 2000, **22**(2):138-147.
- 718 54. Hu H, Lin S, Wang S, Chen X: **The Role of Transcription Factor 21 in Epicardial Cell**  
719 **Differentiation and the Development of Coronary Heart Disease**. *Frontiers in Cell and*  
720 *Developmental Biology* 2020, **8**:457.
- 721 55. Berry-Kravis EM, Lindemann L, Jønch AE, Apostol G, Bear MF, Carpenter RL, Crawley JN, Curie A,  
722 Des Portes V, Hossain F: **Drug development for neurodevelopmental disorders: lessons learned**  
723 **from fragile X syndrome**. *Nature reviews Drug discovery* 2018, **17**(4):280-299.
- 724 56. Tranfaglia MR, Thibodeaux C, Mason DJ, Brown D, Roberts I, Smith R, Williams T, Cogram P:  
725 **Repurposing available drugs for neurodevelopmental disorders: the fragile X experience**.  
726 *Neuropharmacology* 2019, **147**:74-86.
- 727 57. Secchiero P, Bosco R, Celeghini C, Zauli G: **Recent advances in the therapeutic perspectives of**  
728 **Nutlin-3**. *Current pharmaceutical design* 2011, **17**(6):569-577.
- 729 58. Rufini A, Tucci P, Celardo I, Melino G: **Senescence and aging: the critical roles of p53**. *Oncogene*  
730 2013, **32**(43):5129-5143.
- 731 59. Beckerman R, Prives C: **Transcriptional regulation by p53**. *Cold Spring Harbor perspectives in*  
732 *biology* 2010, **2**(8):a000935.
- 733 60. Sheikh T, Sen E: **p53 affects epigenetic signature on SOCS1 promoter in response to TLR4**  
734 **inhibition**. *Cytokine* 2021, **140**:155418.

- 735 61. Tovy A, Spiro A, McCarthy R, Shipony Z, Aylon Y, Allton K, Ainbinder E, Furth N, Tanay A, Barton  
736 M: **p53 is essential for DNA methylation homeostasis in naïve embryonic stem cells, and its**  
737 **loss promotes clonal heterogeneity.** *Genes & development* 2017, **31**(10):959-972.
- 738 62. Levine AJ, Berger SL: **The interplay between epigenetic changes and the p53 protein in stem**  
739 **cells.** *Genes & development* 2017, **31**(12):1195-1201.
- 740 63. Kempermann G: **Seven principles in the regulation of adult neurogenesis.** *European Journal of*  
741 *Neuroscience* 2011, **33**(6):1018-1024.
- 742 64. Kandasamy M, Lehner B, Kraus S, Sander PR, Marschallinger J, Rivera FJ, Trümbach D, Ueberham  
743 U, Reitsamer HA, Strauss O: **TGF-beta signalling in the adult neurogenic niche promotes stem**  
744 **cell quiescence as well as generation of new neurons.** *Journal of cellular and molecular*  
745 *medicine* 2014, **18**(7):1444-1459.
- 746 65. Bond AM, Peng CY, Meyers EA, McGuire T, Ewaleifoh O, Kessler JA: **BMP signaling regulates the**  
747 **tempo of adult hippocampal progenitor maturation at multiple stages of the lineage.** *Stem*  
748 *cells* 2014, **32**(8):2201-2214.

749

## 750 **Figures and Legend**

751

## Figure 1

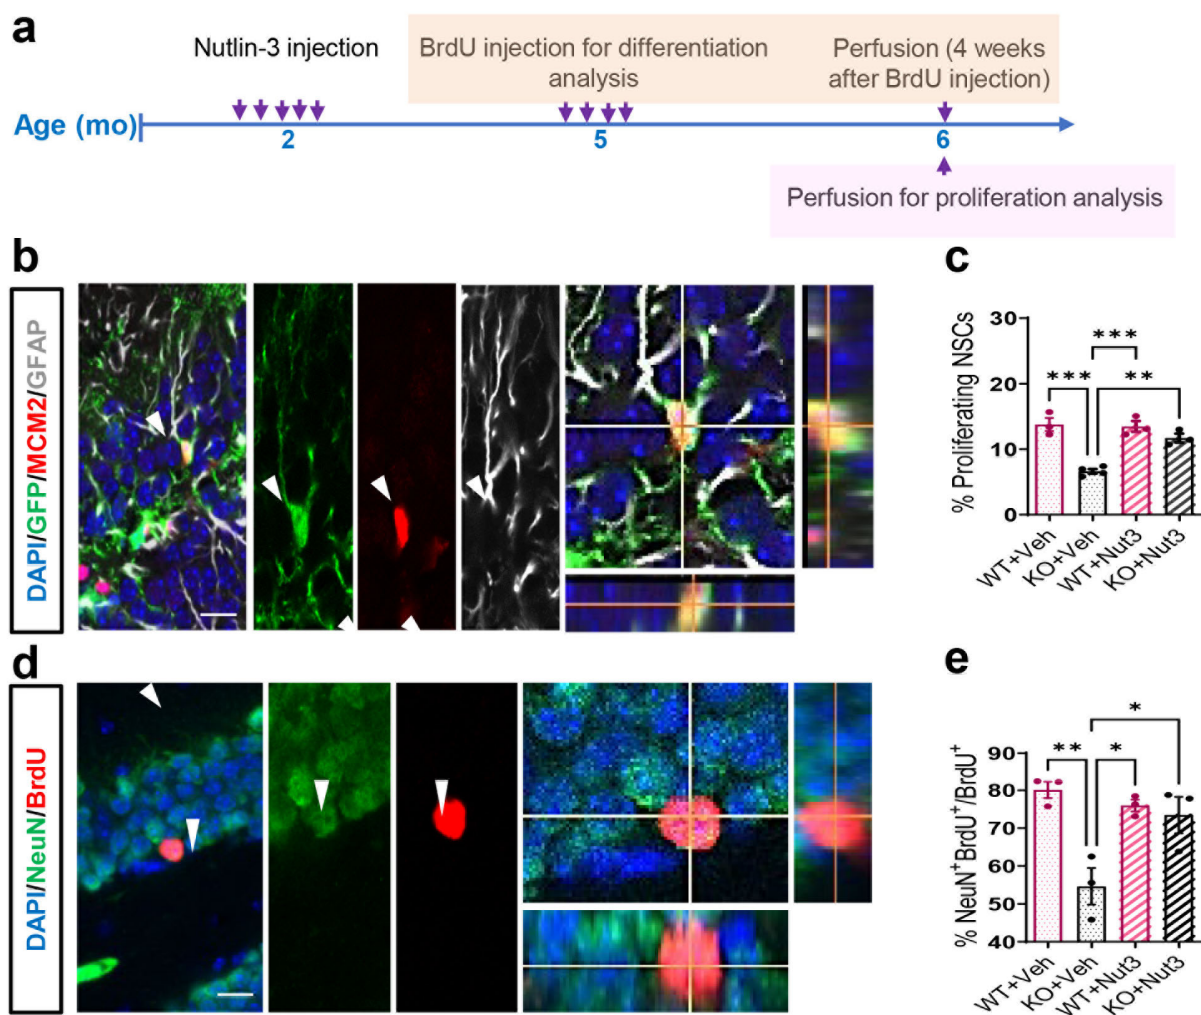

752  
753 **Fig. 1: Transient treatment with Nutlin-3 has long-lasting rescue effect on impaired**  
754 **hippocampal neurogenesis in FMR1-deficient mice.** **a** Experimental scheme for  
755 assessing hippocampal neurogenesis in *Fmr1* KO and WT mice treated with Nutlin-3 or  
756 vehicle. **B** Sample confocal images used for identifying NSCs (GFP+GFAP+) and  
757 proliferating NSPCs (GFP+GFAP+MCM2+) in the dentate gyrus of adult *Fmr1* KO and  
758 WT mice bred into a *Nestin-GFP* mouse background. Scale bar, 20  $\mu$ m. **c** Comparison of  
759 the percentage of activated NSPCs among total NSPCs in the DG of *Fmr1* KO and WT

760 mice with or without Nutlin-3 treatment (n = 3 or 4 per group). **d** Sample confocal images  
761 to identify new mature neurons (NeuN+BrdU+) in the dentate gyrus of *Fmr1* KO and WT  
762 mice. Scale bar, 20  $\mu$ m. **e** Comparison of the percentage of mature neurons among  
763 BrdU+ cells in DG of *Fmr1* KO and WT mice with or without Nutlin-3 treatment (n = 3 per  
764 group). \*P < 0.05; \*\*P < 0.01 \*\*\*P < 0.001. Data are presented as means  $\pm$  SEM.

765

766



## Figure 2

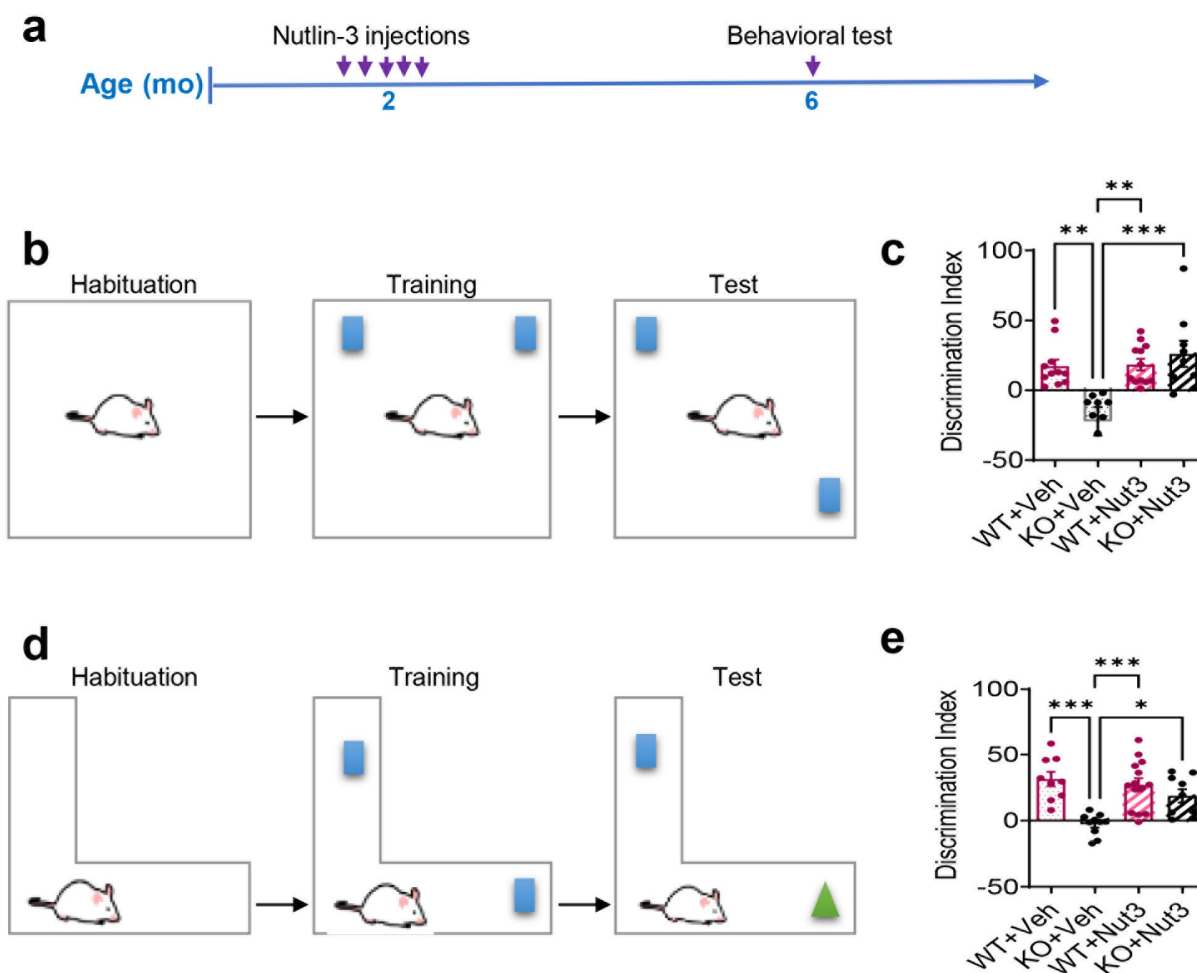

767  
768 **Fig. 2: Transient treatment with Nutlin-3 has long-lasting rescue effect on cognitive**  
769 **deficits in FMR1-deficient mice.** **a** Experimental scheme for analyzing cognitive  
770 performances in *Fmr1* KO and WT mice treated with Nutlin-3 or vehicle. **b** Schematic of  
771 novel location test for assessing spatial learning. **c** Beneficial effects of Nutlin-3 treatment  
772 on spatial memory deficits in *Fmr1* KO mice sustained at least 4-months after injection  
773 (n = 8 to 13mice per group). **d** Schematic of the novel object recognition test. **e**  
774 Therapeutic effects of Nutlin-3 treatment on deficits in the novel object recognition test in

775 *Fmr1* KO mice last at least for 4-months after treatment cessation (n = 8 to 13 mice per  
776 group). \*P < 0.05; \*\*P < 0.01 \*\*\*P < 0.001. Data are presented as means ± SEM.

## Figure 3

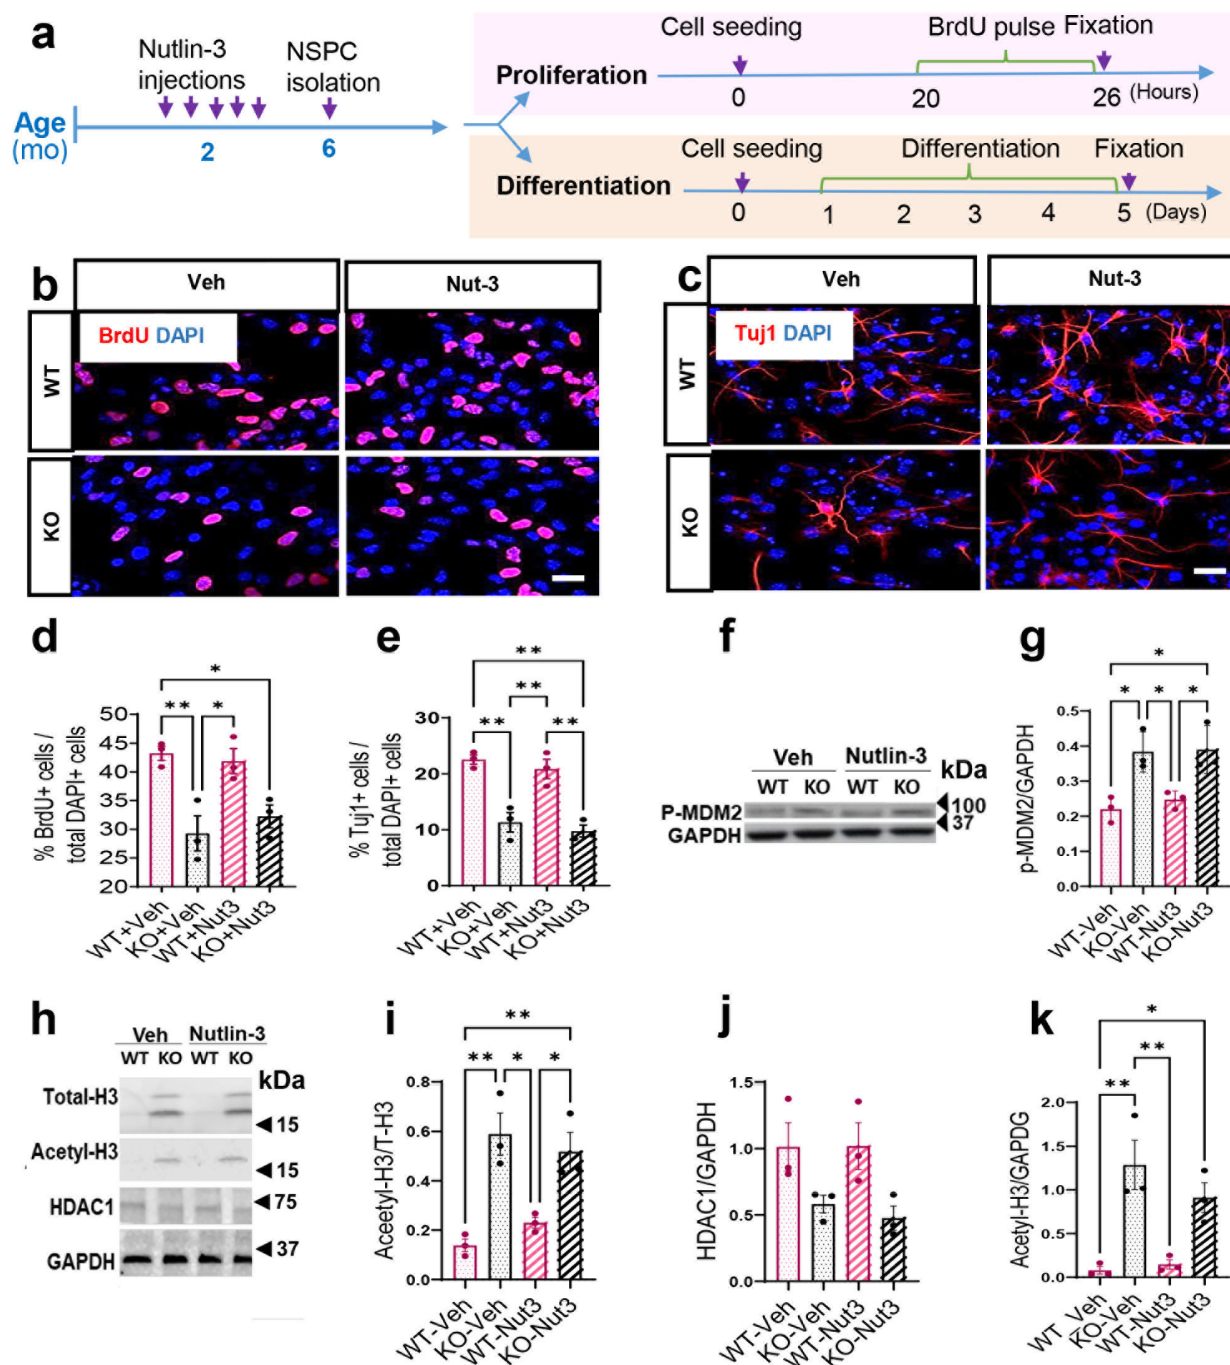

777  
778 **Fig. 3: Transient treatment with Nutlin-3 does not have persistent effect on intrinsic**  
779 **properties of adult neural progenitor cells. a** Experimental scheme for analyzing

780 proliferation and differentiation of hippocampal NSPCs isolated from *Fmr1* KO and WT  
781 mice treated with Nutlin-3 or vehicle. **b** Sample images of proliferating NSPCs pulse  
782 labeled with thymidine analog, BrdU followed by immunohistology for in vitro  
783 quantification assay. Red, BrdU; blue, DAPI; scale bar, 20  $\mu$ m. **c** Sample images of  
784 differentiating NSPCs assessed by immunohistological detection of a neuronal marker  
785 Tuj1<sup>+</sup> for in vitro quantification of NSPC neuronal differentiation. Red, Tuj1; blue, DAPI;  
786 scale bar, 20  $\mu$ m. **(d, e)** Nutlin-3 treatment did not rescue impaired proliferation **(d)** and  
787 neuronal differentiation **(e)** of hippocampal NSPCs isolated from *Fmr1* KO and WT mice  
788 4-months after injection (n = 3). **(f, g)** Western blot analysis of P-MDM2 levels in isolated  
789 NSPCs isolated from *Fmr1* KO and WT 4-months after Nutlin-3 or vehicle treatment (n =  
790 3). GAPDH was used as loading control. **(h, k)** Western blot analysis of total histone H3,  
791 acetylated histone H3, and HDAC1 levels in NSPCs isolated from *Fmr1* KO and WT  
792 mice 4-months after Nutlin-3 or vehicle treatment (n = 3). Glyceraldehyde-3-phosphate  
793 dehydrogenase (GAPDH) was used as loading control. \*P < 0.05; \*\*P < 0.01 \*\*\*P < 0.001.  
794 Data are presented as means  $\pm$  SEM.

## Figure 4

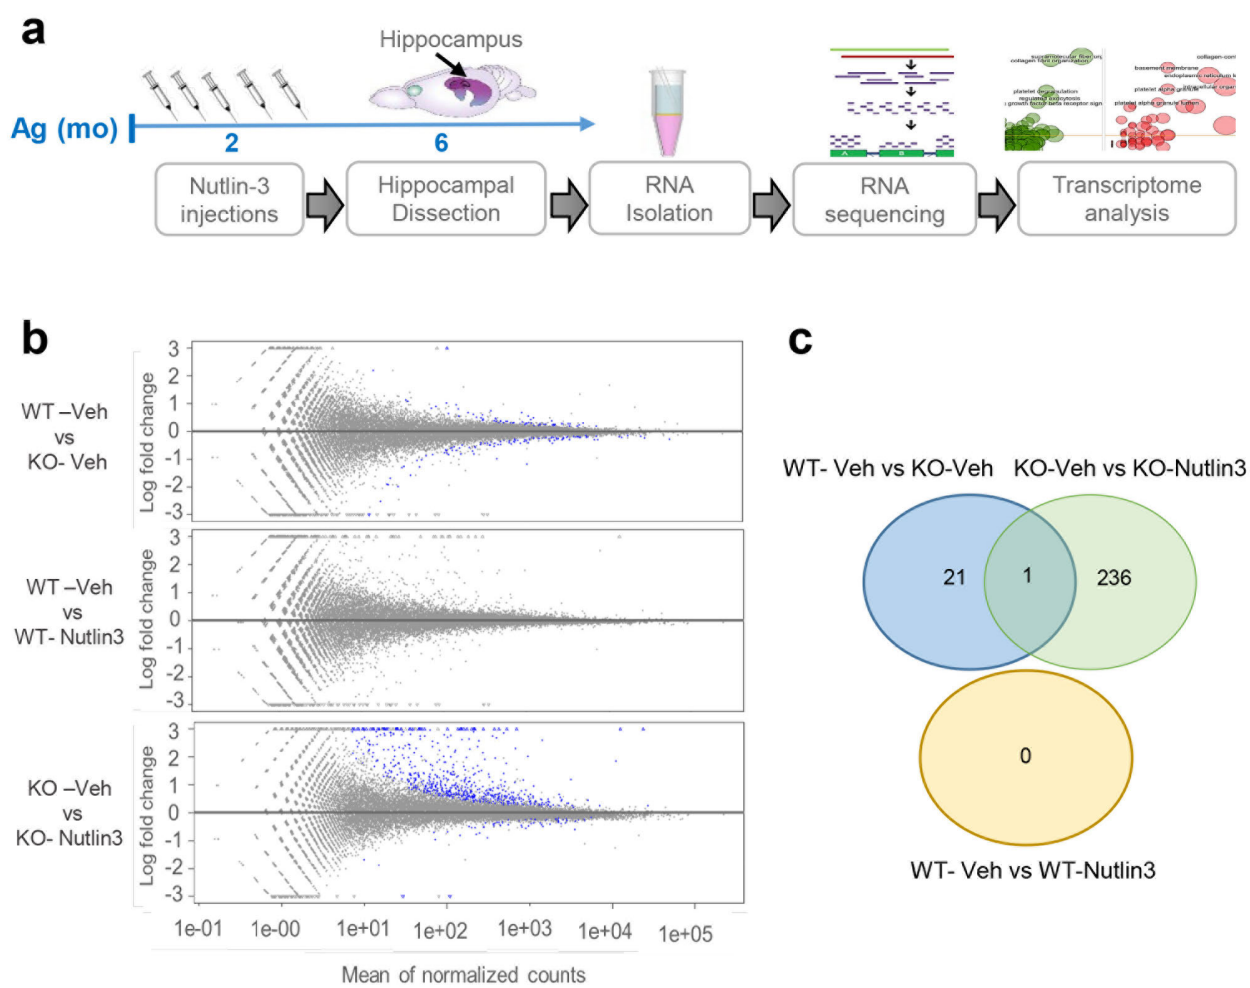

795  
 796 **Fig. 4: Transient treatment with Nutlin-3 leads to long-lasting gene expression**  
 797 **changes in the hippocampus of FMR-deficient mice.** **a** Experimental time line for  
 798 sample collection and transcriptomic profiling of the hippocampal tissue of *Fmr1* KO and  
 799 WT mice injected with Nutlin-3 or vehicle (n = 3 per group) . **b** M-A plot of M (log ratio)  
 800 and A (mean average) displaying log<sub>2</sub> fold-change of genes compared with mean  
 801 expression levels of all genes with log<sub>2</sub> fold-change thresholds between -3 and 3. The  
 802 genes identified differential expression (adjusted P < 0.05) are indicated as blue dots. **c**

803 Venn diagram showing overlap patterns of differentially expressed genes between  
804 different experimental groups.

Figure 5

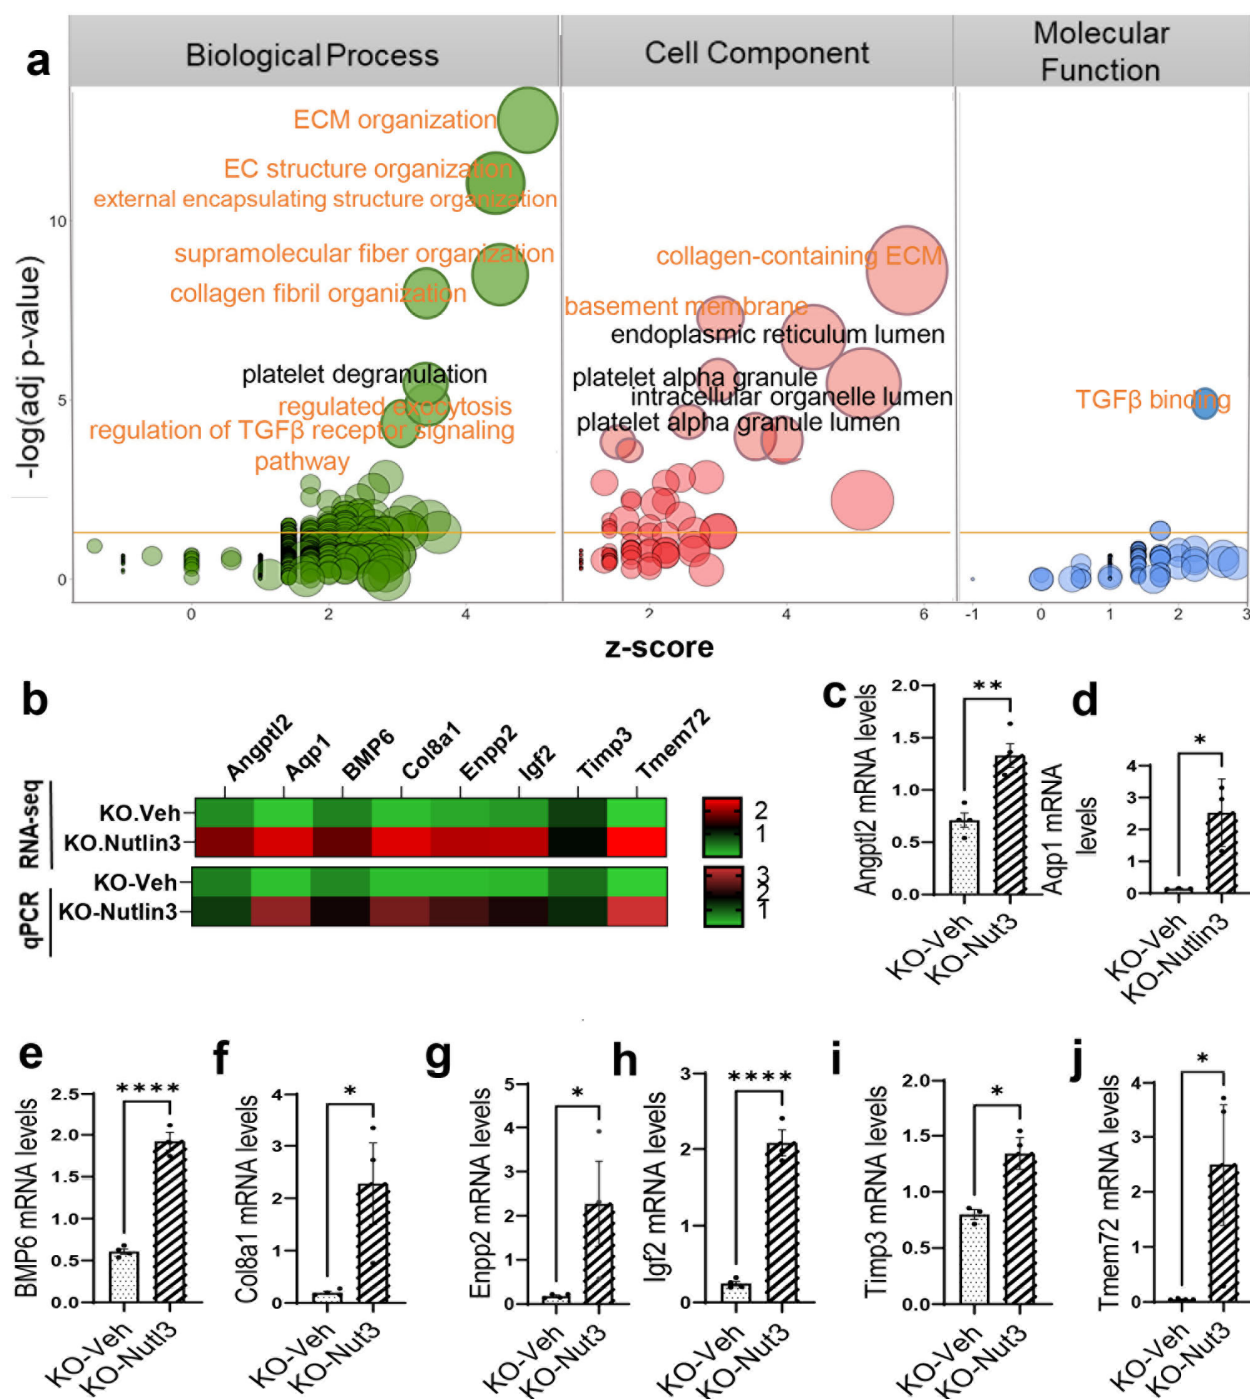

805  
806 **Fig. 5: DEGs in FMR-deficient mice treated with Nutlin-3 were enriched for gene**  
807 **associated adult neural stem cell niche regulation.** a Bubble plots for gene ontology

808 (GO) analysis showing enriched terms identified with Enricher for DEGs between *Fmr1*  
809 KO treated with Nutlin-3 or Vehicle. Three different categories of GO analysis results  
810 are shown. The size of bubbles indicates the number of genes. The x axis  
811 indicates z score (negative = downregulated in Nutlin-3 treated *Fmr1* KO mice;  
812 positive = upregulated in Nutlin-3 treated *Fmr1* KO mice). The y axis indicates  
813 negative logarithm of adjusted *P* value from GO analysis (higher = more significant).  
814 ECM organization, membrane proteins and secreted factors are top hits in each GO  
815 category. **b** Heat map of transcriptional changes of selected DE genes between Nutlin-  
816 3 and vehicle-treated *Fmr1* KO mice, revealed by DESeq2 (n = 3) and qPCR analysis  
817 (n = 4). Red and green represent upregulation and downregulation, respectively. **(c-j)**  
818 Quantitative PCR analysis to validate a subset of DEGs in each GO category including  
819 *Angptl2* (c), *Aqp1* (d), *Bmp6* (e), *Col8a1* (f), *Enpp2* (g), *Igf2* (h), *Tmp3* (i), and *Tmem72*  
820 (j) (n = 3/condition). The mRNA levels of Glyceraldehyde-3-phosphate dehydrogenase  
821 (GAPDH) was used as the internal control. \**P* < 0.05; \*\**P* < 0.01 \*\*\**P* < 0.001. Data are  
822 presented as means ± SEM.



## Figure 6

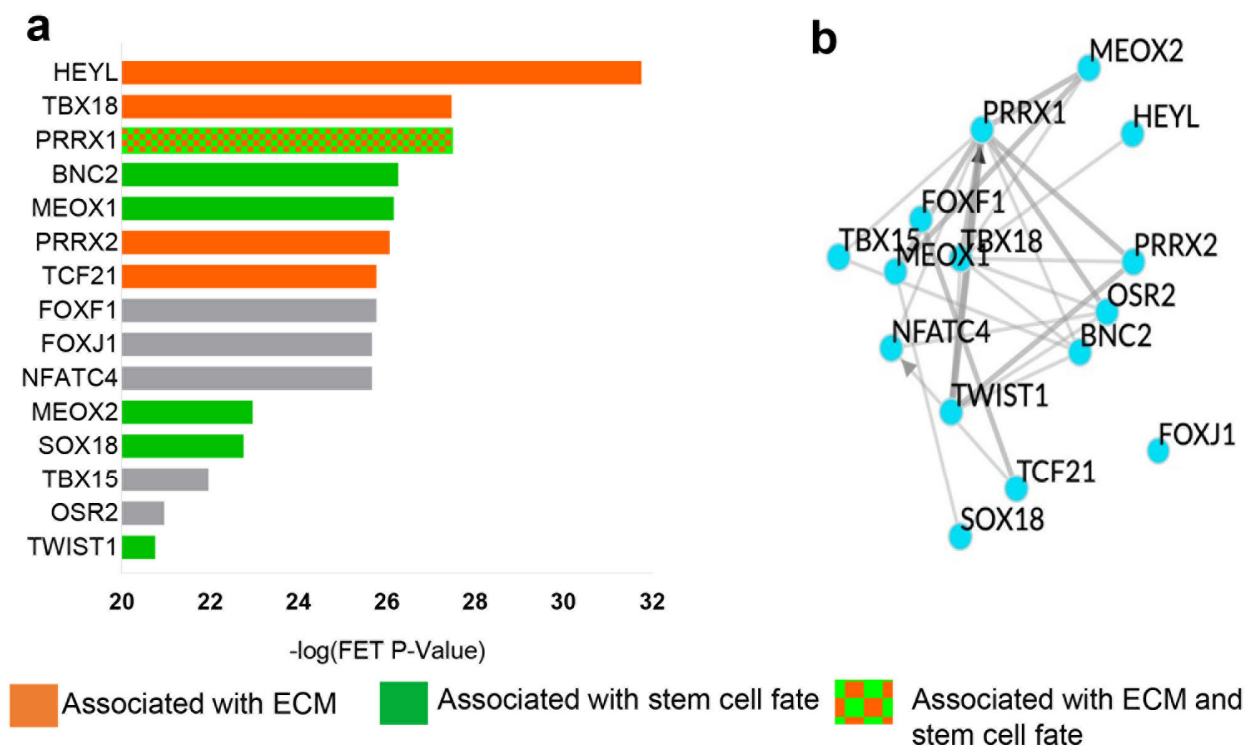

823  
824 **Fig. 6: Top TFs ranked by TFs enrichment analysis were associated to ECM and**  
825 **stem cell fate. a** Transcription factor target enrichment analysis of differentially  
826 expressed genes in *Fmr1* KO treated with Nutlin-3 vs vehicle using average integrated  
827 ranks across all libraries through ChEA3 (n = 3). FET, Fisher's exact test. Orange bars  
828 indicate TFs associated with ECM. Green bars indicate TFs associated with stem cell  
829 fate. Orange and green patterned bars indicate TFs associated to both ECM and stem  
830 cell function. **b** top TFs network generated by ChEA3 using average integrated ranks  
831 across all libraries.

832

### 833 Supplementary File List

834 **Additional file 1:**

835 **Code S1.** R codes for differentially expressed gene analysis.

836 **Code S2.** R codes for STAR alignment

837

838 **Additional file 2:**

839 **Table S1.** Primer sequences for qPCR.

840 **Table S2.** Result of RNA-seq read alignment.

841 **Table S3.** Raw read counts of RNA-seq samples

842 **Table S4.** Differentially expressed genes among experimental groups.

843 **Table S5.** GO enrichment analysis results

844

845 **Additional file 3:**

846 **Fig. S1.** Transient treatment with Nutlin-3 has long-lasting rescue effect on cognitive  
847 deficits in mice with selective deletion of Fmr1 in adult new neurons

848 **Fig. S2.** Boxplot to show the density distribution of raw log-intensities of RNA-seq data of  
849 all samples.

850 **Fig. S3.** GO analysis of top upstream TF.
